# Supplementary material for: Embedding dopamine nanoaggregates into a poly(dimethylsiloxane) membrane to confer controlled interactions and free volume for enhanced separation performance
Source: Royal Society of Chemistry journal article supplement (doi:10.1039/c3ta00766a), 2013-01-01
Supplement: c3ta00766a.pdf [file c3ta00766a.pdf]

## Supporting Information

### **Embedding Dopamine Nanoaggregates into Poly(dimethylsiloxane) Membrane to Confer Controlled Interactions and Free Volume for Enhanced Separation Performance**

Wanpeng Liu,<sup>a</sup> Yifan Li,<sup>a</sup> Xiangxi Meng,<sup>a</sup> Guanhua Liu,<sup>a</sup> Shen Hu,<sup>a</sup> Fusheng Pan,<sup>a</sup>

Hong Wu,<sup>a</sup> Zhongyi Jiang,<sup>\*a</sup> Baoyi Wang,<sup>b</sup> Zhuoxin Li<sup>b</sup> and Xingzhong Cao<sup>b</sup>

<sup>a</sup> Key Laboratory for Green Chemical Technology of Ministry of Education, School of Chemical Engineering and Technology, Tianjin University, Tianjin 300072, China

<sup>b</sup> Key Laboratory of Nuclear Analysis Techniques, Institute of High Energy Physics, Chinese Academy of Sciences, Beijing 100049, China

\*To whom correspondence should be addressed. E-mail: [zhyjiang@tju.edu.cn](mailto:zhyjiang@tju.edu.cn)

## 1. TEM analysis of the nanoaggregates

According to **Figure 1**, each type of nanoaggregates (dopamine, dopamine/Cu, dopamine/Ni and dopamine/Ce) exhibited the regularly spherical shape with sizes around 100 nm. From the measurements of particle size distribution analyzer, the sizes of dopamine, dopamine/Cu, dopamine/Ni and dopamine/Ce nanoaggregates were 108, 102, 102 and 74 nm, respectively. The size of dopamine/Ce nanoaggregate was smaller than that of other nanoaggregates. It can be explained that cerium(IV) ammonium nitrate is a superior oxidizing agent under acidic and neutral conditions due to its large reduction potential value of 1.61 V (vs normal hydrogen electrode).<sup>1</sup> Thus, with reducibility surface, the dopamine nanoaggregate was partly oxidized and consumed by the Ce(IV) ion.<sup>2</sup> The dispersion of nanoaggregates was evaluated by polydispersity parameters (*PP*) measured by the particle size distribution analyzer. The dopamine nanoaggregates (*PP*=0.256) tended to agglomerate whereas the dopamine/Cu (*PP*=0.173), dopamine/Ni (*PP*=0.198) and dopamine/Ce (*PP*=0.159) nanoaggregates were evenly dispersed. The metal-organic coordination interaction between transition metal ions and amino- or catechol groups of dopamine/M nanoaggregates was advantageous for suppressing the undesirable agglomeration.

### References:

- 1 V. Nair and A. Deepthi, *Chem. Rev.*, 2007, **107**, 1862.
- 2 Y. R. Ma, H. Y. Niu, X. L. Zhang and Y. Q. Cai, *Chem. Commun.*, 2011, **47**, 12643.

## 2. FTIR spectra of the nanoaggregates

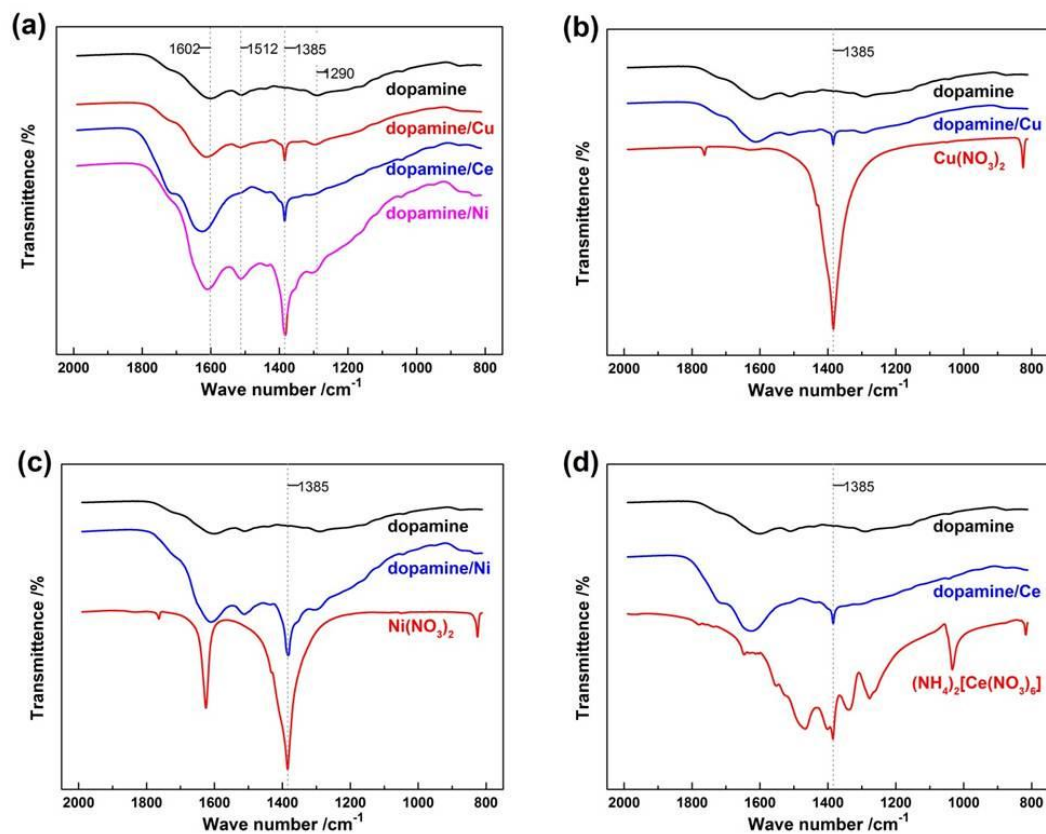

**Figure S1.** FTIR spectra of (a) dopamine, dopamine/Cu, dopamine/Ni and dopamine/Ce nanoaggregates; (b) dopamine, dopamine/Cu nanoaggregates and  $\text{Cu}(\text{NO}_3)_2$ ; (c) dopamine, dopamine/Ni nanoaggregates and  $\text{Ni}(\text{NO}_3)_2$ ; (d) dopamine, dopamine/Ce nanoaggregates and  $(\text{NH}_4)_2[\text{Ce}(\text{NO}_3)_6]$ .

The intensity of band around  $1385 \text{ cm}^{-1}$  increased when the dopamine nanoaggregate was chelated by the metal ion. This phenomenon reflected the contribution from the nitrate ion adsorbed on the surface of dopamine/M nanoaggregate. The chemical structure of nitrate including  $\text{Cu}(\text{NO}_3)_2$ ,  $\text{Ni}(\text{NO}_3)_2$ , and  $(\text{NH}_4)_2[\text{Ce}(\text{NO}_3)_6]$  characterized by FTIR spectra was shown in [Figure S2](#). It could be observed that the characteristic peak of nitrate ions in the  $\text{Cu}(\text{NO}_3)_2$ ,  $\text{Ni}(\text{NO}_3)_2$ , and  $(\text{NH}_4)_2[\text{Ce}(\text{NO}_3)_6]$  included the absorption bands at  $1385 \text{ cm}^{-1}$ . The

pristine dopamine nanoaggregate displayed the weak absorption at the same positions, corresponding to N-H bending and aromatic C=N stretching vibration. In contrast, the as-prepared dopamine/M nanoaggregates showed the intense absorption features at around  $1385\text{ cm}^{-1}$ , due to the residual nitrate ion on the surface.

### 3. FTIR spectra of the membranes

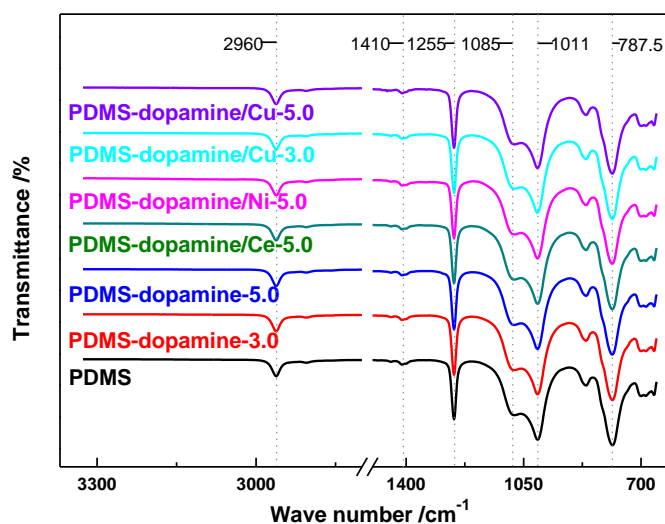

**Figure S2.** FTIR spectra of the PDMS control, PDMS-dopamine, PDMS-dopamine/Cu, PDMS-dopamine/Ni and PDMS-dopamine/Ce membranes.

The FTIR spectra of the PDMS control, PDMS-dopamine, PDMS-dopamine/Cu, PDMS-dopamine/Ni and PDMS-dopamine/Ce membranes were recorded in [Fig. S2](#). The characteristic peak at around  $787.5\text{ cm}^{-1}$  in the membranes were assigned to stretching vibrations of Si-C. The peak appeared at about  $1085$  and  $1011\text{ cm}^{-1}$  was corresponded to stretching vibrations of Si-O-Si. The characteristic peak at around  $1255\text{ cm}^{-1}$  represented the deformation vibrations of the two methyls linked with Si. The weak absorption peak around  $1410\text{ cm}^{-1}$  and  $2960\text{ cm}^{-1}$  were the dissymmetry deformation vibrations of methyl joined with Si and stretching vibrations of C-H, respectively. The FTIR spectra of the PDMS-dopamine, PDMS-dopamine/Cu, PDMS-dopamine/Ni and PDMS-dopamine/Ce membranes did not generate new absorption peaks compared with the PDMS control membrane, suggesting that the

nanoaggregates were physically blended within the PDMS matrix.

#### 4. TGA measurements of the nanoaggregates

The TGA of dopamine, dopamine/Cu, dopamine/Ni and dopamine/Ce nanoaggregates was shown in **Figure 5**. The thermal decomposition of dopamine nanoaggregates could be divided into two stages. The first stage indicated a loss of 6.5 wt%, between 40 and 150 °C, which attributed to the elimination of adsorbed water on the surface of nanoaggregates. The second stage indicated a loss of 48.8 wt%, between 150 and 800 °C, due to the decomposition of dopamine nanoaggregates. The superior thermal stability of dopamine nanoaggregates ascribed to their inside non-covalent interactions. The thermal decomposition of dopamine/Cu, dopamine/Ni and dopamine/Ce nanoaggregates could be divided into three stages. The first stage of dopamine/M nanoaggregates was attributed to the removing of adsorbed water on the surface. The second stage (110~250 °C for dopamine/Cu NPs, 140~295 °C for dopamine/Ni NPs and 125~290 °C for dopamine/Ce NPs) was attributed to the removal of metallo-chelate on the surface. And the third stage of dopamine/M nanoaggregates was the decomposition of dopamine nanoaggregates.

## 5. DTA curves of the membranes

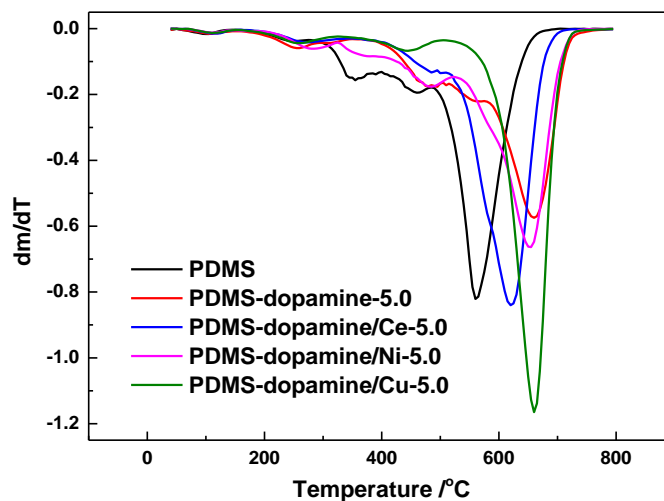

**Figure S3.**  $dm/dT$  as a function of temperature for the PDMS control, PDMS-dopamine-5.0, PDMS-dopamine/Cu-5.0, PDMS-dopamine/Ni-5.0 and PDMS-dopamine/Ce-5.0 membranes.



## 6. Effect of the metal ion kinds on membrane separation performance

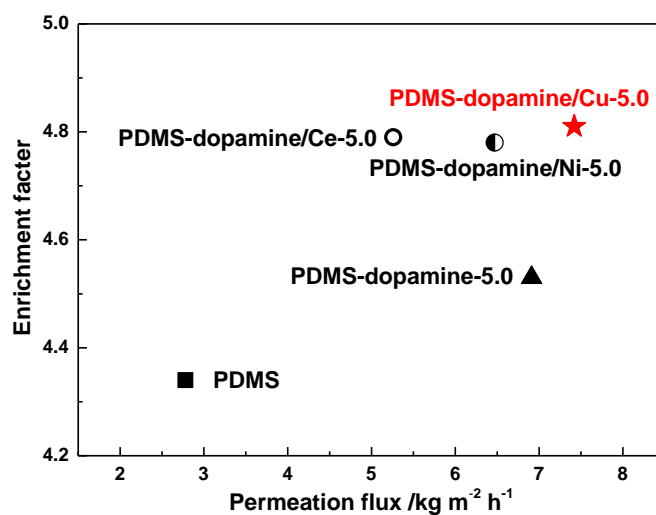

**Figure S4.** Permeation flux and enrichment factor of PDMS control, PDMS-dopamine-5.0, PDMS-dopamine/Cu-5.0, PDMS-dopamine/Ni-5.0 and PDMS-dopamine/Ce-5.0 membranes for a feed of 1,500 ppmw thiophene in *n*-octane at 303 K with a flow rate of 40 L/h.

## 7. Arrhenius relationship for permeation of *n*-octane and thiophene through the membranes

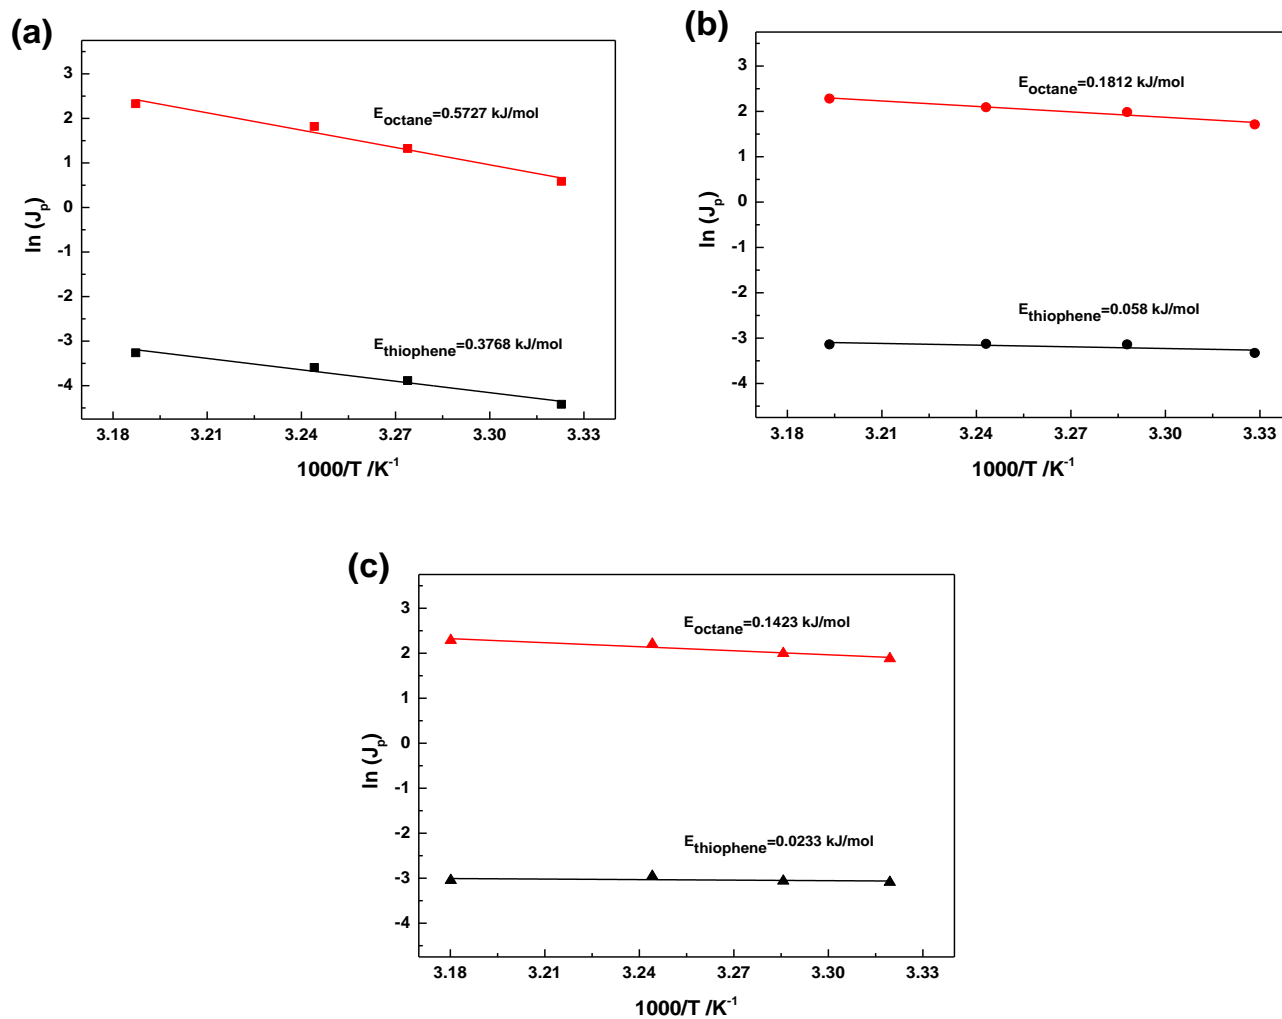

**Figure S5.** Arrhenius plots of permeation flux for separation of thiophene/octane mixture by (a) PDMS control, (b) PDMS-dopamine-5.0 and (c) PDMS-dopamine/Cu-5.0 membranes for a feed of 1,500 ppmw thiophene in *n*-octane with a flow rate of 40 L/h.

## 8. Long-term operation stability of the membranes

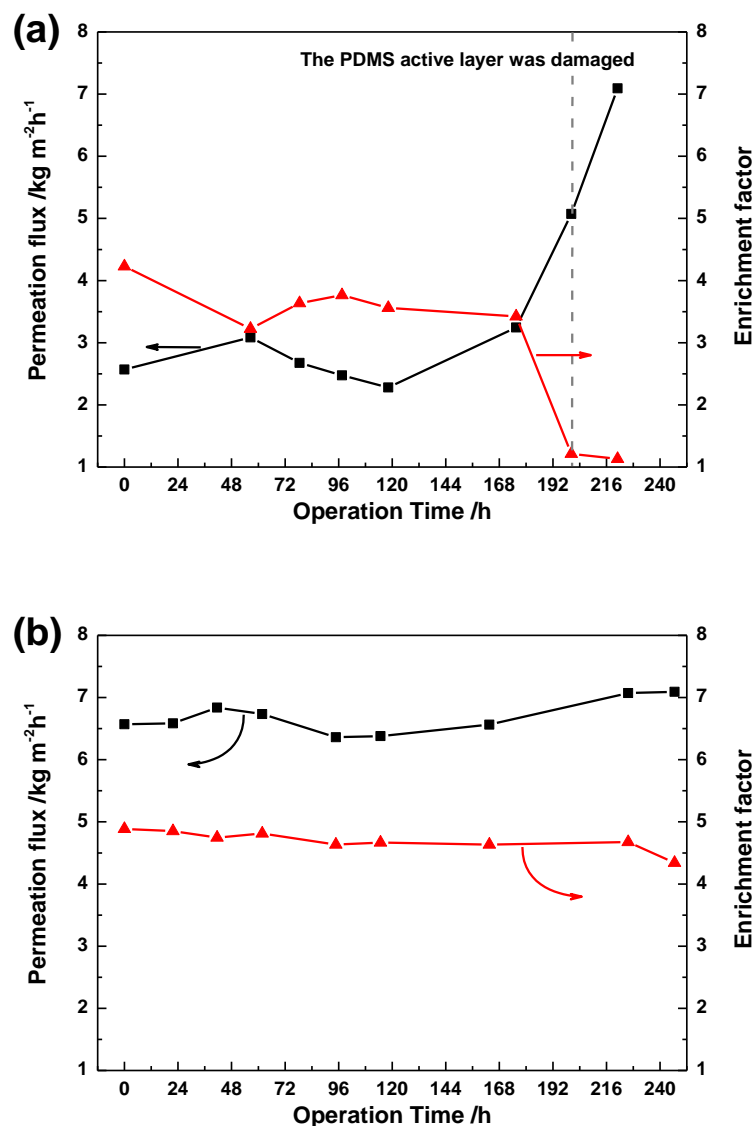

**Figure S6.** Long-term operation test of (a) PDMS control membrane and (b) PDMS-dopamine/Cu membrane.

The long-term operation stability is a vital index for the industrial application of membrane. **Figure S6** showed the long-term pervaporation performance test of the PDMS control and PDMS-dopamine/Cu membranes continuously operated for over 250 h for a feed of 1,500 ppmw thiophene in *n*-octane at 303 K with a flow rate of 40 L/h. As shown in **Figure S6(a)**, after 175 h, the active layer of PDMS control

membrane was damaged due to excessive swelling in the penetrant, exhibiting low long-term and chemical stability. During the entire test, the permeation flux and enrichment factor of PDMS-dopamine/Cu membrane remained almost unchanged, as shown in **Figure S6(b)** demonstrating favorable long-term operation stability and implying the desirable structural and chemical stability of as-prepared hybrid membrane.
